# Supplementary figures and images for: Cell autonomous regulation of hippocampal circuitry via Aph1b-γ-secretase/neuregulin 1 signalling
Source: eLife journal article supplement (doi:10.7554/elife.02196), 2014-06-02

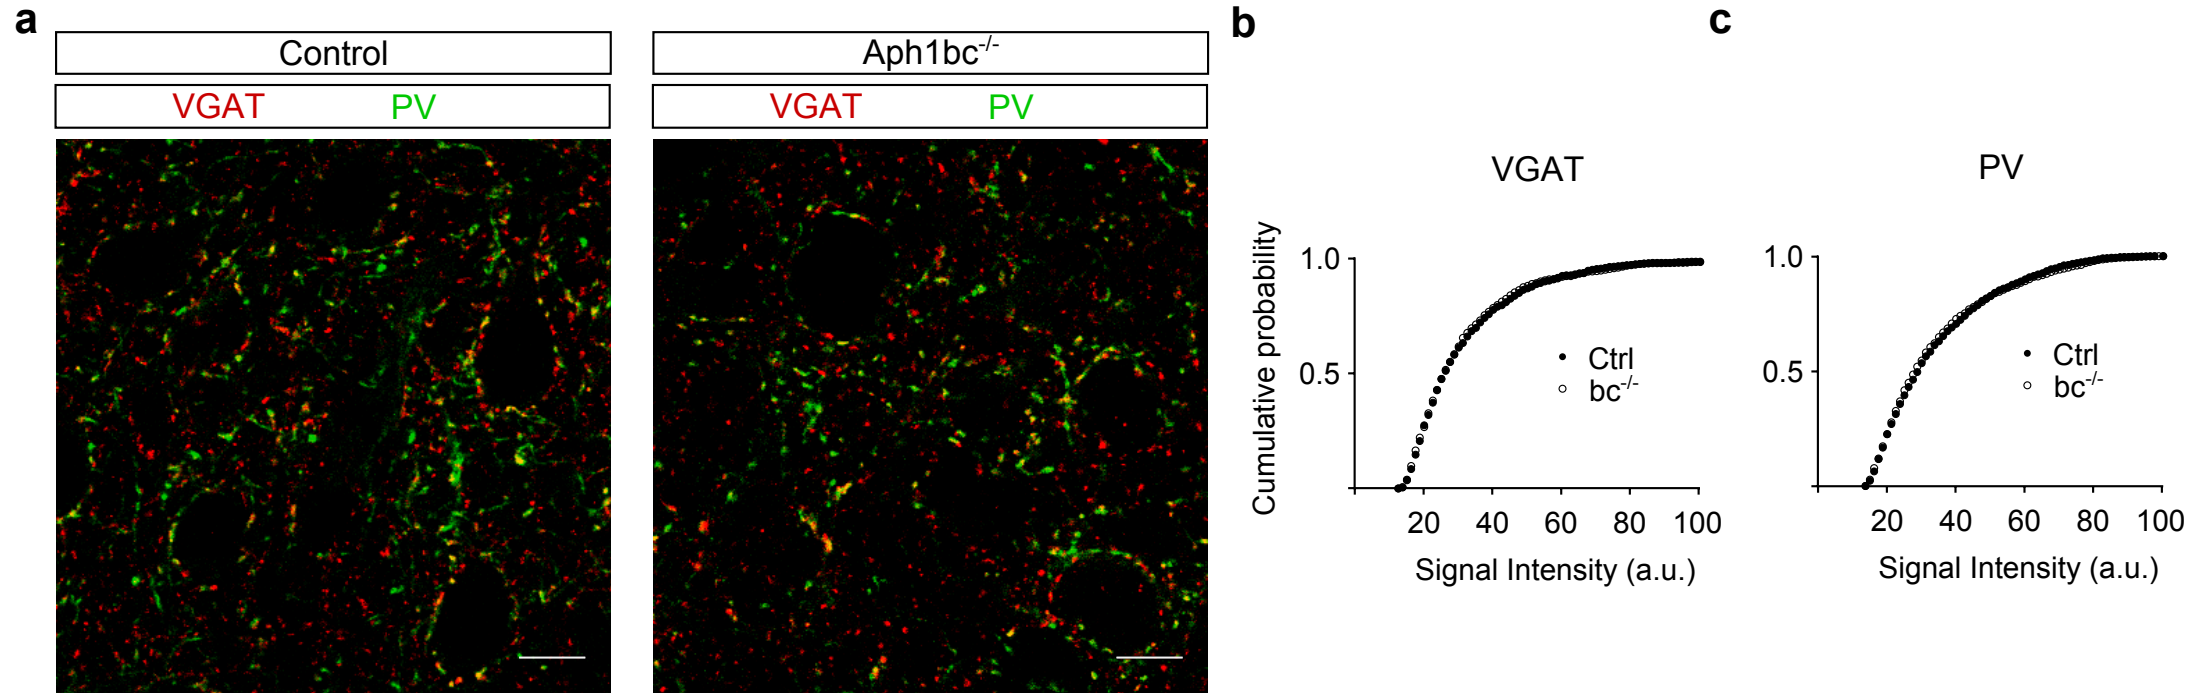

Supplement: supp [file elife-02196-supp-v1.zip]
